# Supplementary material
Source: publisher figshare collection journal article supplement (https://tandf.figshare.com/ndownloader/files/16356377)
Supplement: Supplementary file 1 [file 16356377]

Supplementary Information of

**Rice sprout endophytic *Enterobacter* sp. SE-5 could improve tolerance  
of mature rice plants to salt or Cd<sup>2+</sup> in soils**

Yupei Liu<sup>a</sup>, Hongming Tan<sup>b</sup>, Lixiang Cao<sup>b</sup>, and Renduo Zhang<sup>a</sup>

<sup>a</sup>Guangdong Provincial Key Laboratory of Environmental Pollution Control and Remediation Technology, School of Environmental Science and Engineering, Sun Yat-sen University, Guangzhou, China; <sup>b</sup>School of Life Sciences, Guangdong Provincial Key Laboratory for Climate Change and Natural Disaster Studies, Sun Yat-sen University, Guangzhou, China

**CONTACT:**

Lixiang Cao; School of Life Sciences, Guangdong Provincial Key Laboratory for Climate Change and Natural Disaster Studies, Sun Yat-sen University, Guangzhou, China; Email: [caolx@mail.sysu.edu.cn](mailto:caolx@mail.sysu.edu.cn)

Renduo Zhang; Guangdong Provincial Key Laboratory of Environmental Pollution Control and Remediation Technology, School of Environmental Science and Engineering, Sun Yat-sen University, Guangzhou, China; Email: [zhangrd@mail.sysu.edu.cn](mailto:zhangrd@mail.sysu.edu.cn)

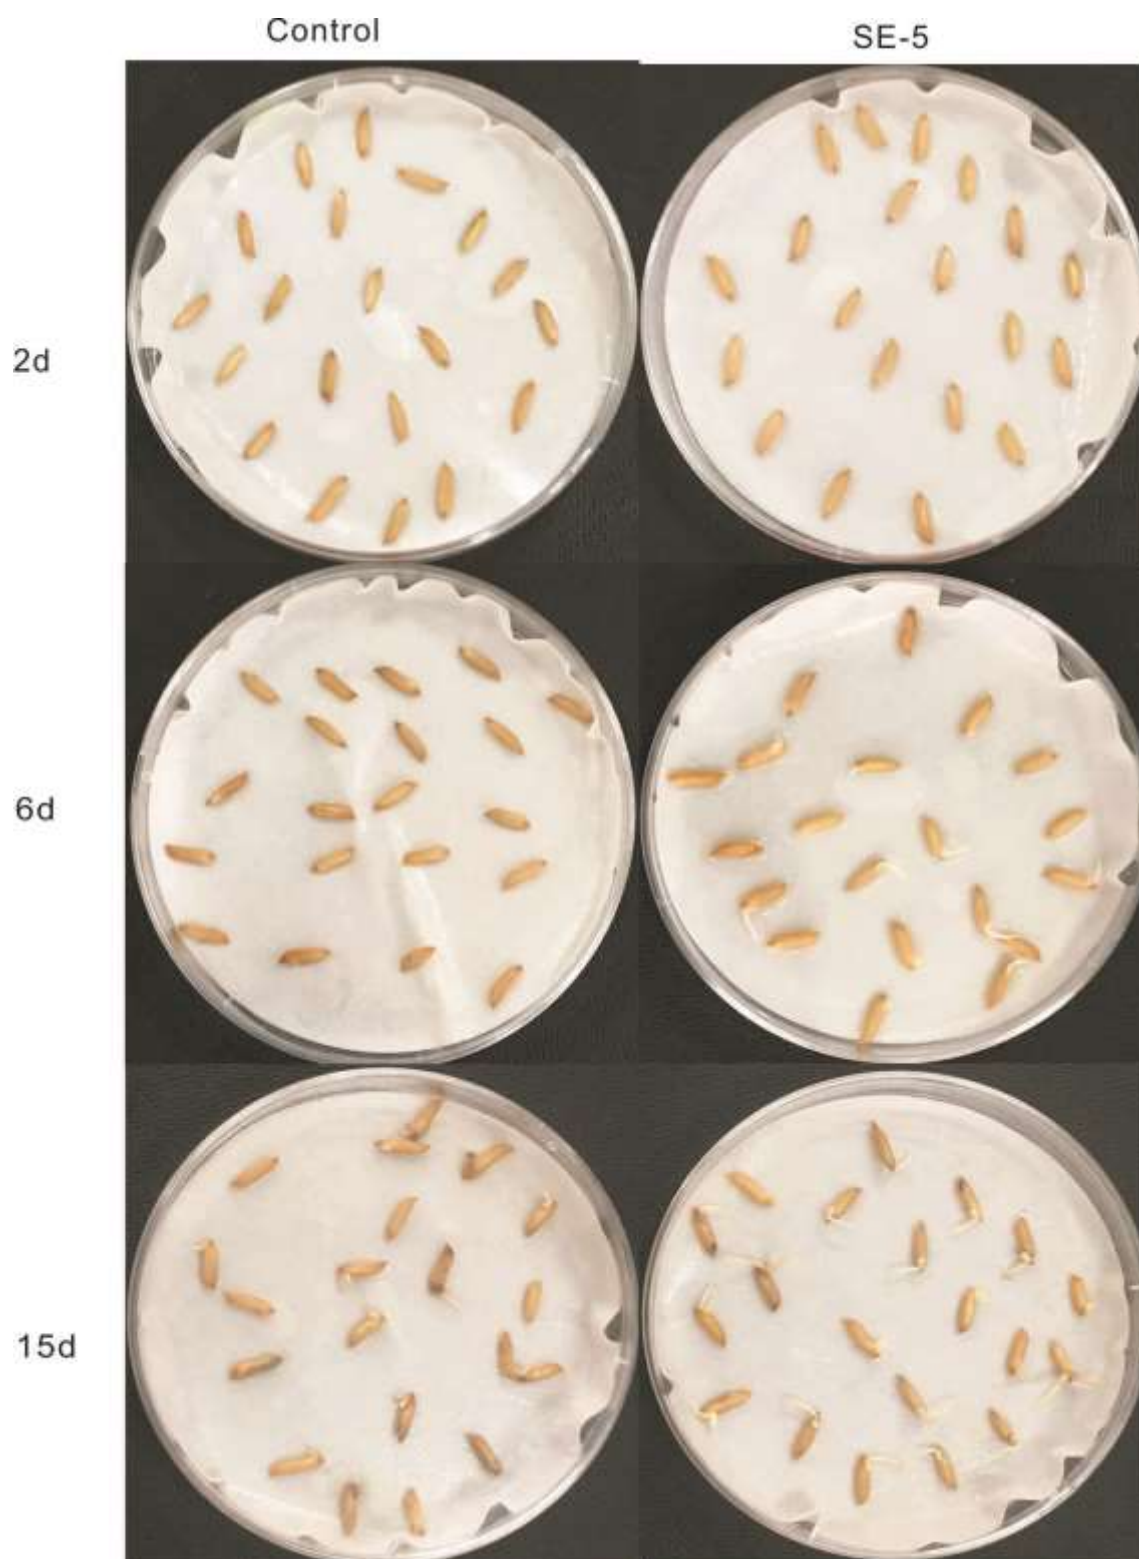

Figure S1. Germination of rice seeds treated with sterile water (the control) and endophytic *Enterobacter* sp. SE-5 under the saline stress of 20 g L<sup>-1</sup> during different periods.

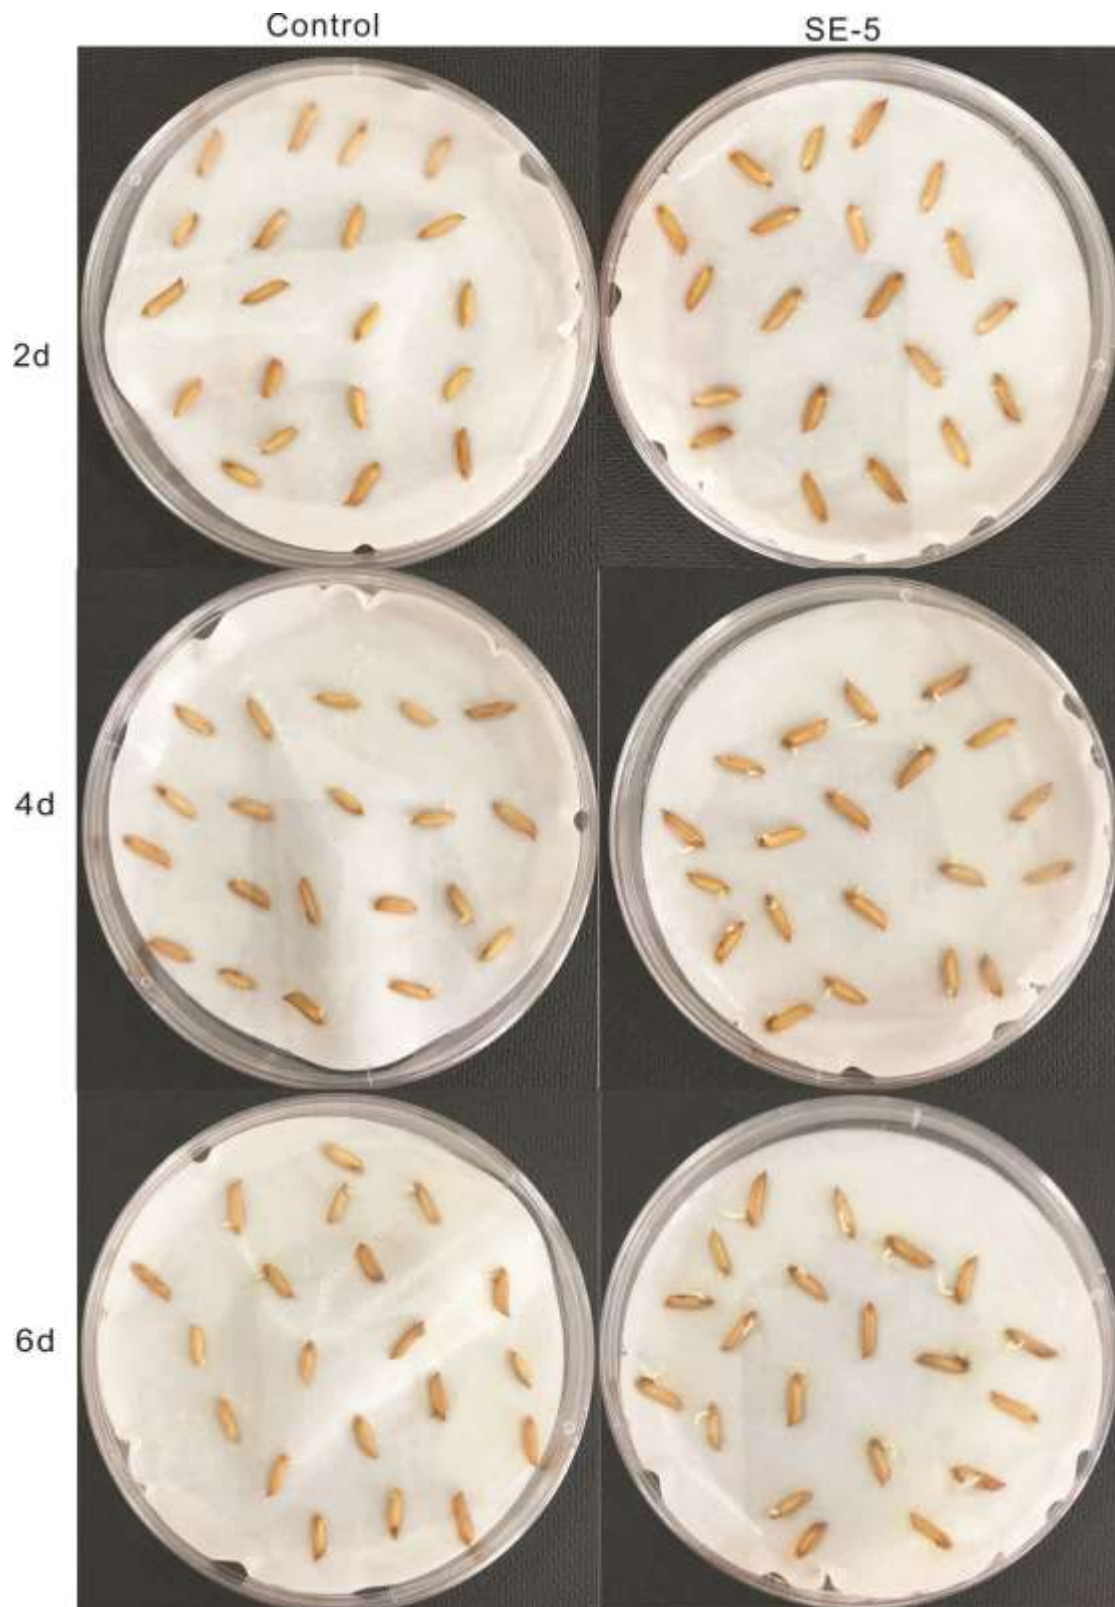

Figure S2. Germination of rice seeds treated with sterile water (the control) and endophytic *Enterobacter* sp. SE-5 under the Cd stress of  $0.3 \text{ g L}^{-1}$  during different periods.
